# Supplementary material for: 明治・大正期の女子労働政策(1)(山岡通〓,宮崎澄夫両教授退職記念号)
Source: MDPI journal article supplement (doi:10.3390/ijms232415908), 1989-03-01
Supplement: s1 [file s1]

**Table S2.** Soluble factors in pooled activated-PRP

| TYPE | FACTOR    | (pg/ml) |                                                       |
|------|-----------|---------|-------------------------------------------------------|
| CYT  | ICAM2     | 790,983 | Intercellular adhesion molecule 2                     |
| CYT  | PLG       | 182,992 | Plasminogen                                           |
| REC  | VCAM1     | 102,461 | Vascular cell adhesion protein 1                      |
| CYT  | IL13RA2   | 94,449  | Interleukin-13 receptor subunit alpha-2               |
| CHE  | IL9       | 73,686  | Interleukin-9                                         |
| GF   | IGFBP4    | 72,637  | Insulin-like growth factor-binding protein 4          |
| REC  | MICB      | 66,893  | MHC class I polypeptide-related sequence B            |
| GF   | TGFB1     | 58,819  | Transforming growth factor beta-1                     |
| CHE  | PF4       | 56,183  | Platelet factor 4                                     |
| CYT  | IL23A     | 47,225  | Interleukin-23 subunit alpha                          |
| CYT  | FLT1      | 47,188  | Vascular endothelial growth factor receptor 1         |
| INF  | PDGFB     | 47,171  | Platelet-derived growth factor subunit B              |
| CHE  | IL31      | 38,293  | Interleukin-31                                        |
| GF   | BMP7      | 35,835  | Bone morphogenetic protein 7                          |
| CYT  | SIGLEC5   | 35,491  | Sialic acid-binding Ig-like lectin 5                  |
| GF   | IGFBP3    | 34,608  | Insulin-like growth factor-binding protein 3          |
| CHE  | CCL26     | 34,511  | C-C motif chemokine 26                                |
| GF   | FGF4      | 33,301  | Fibroblast growth factor 4                            |
| CHE  | SPP1      | 30,604  | Osteopontin                                           |
| GF   | BMP4      | 28,461  | Bone morphogenetic protein 4                          |
| GF   | IGFBP2    | 27,669  | Insulin-like growth factor-binding protein 2          |
| REC  | IL21R     | 26,521  | Interleukin-21 receptor                               |
| REC  | SELL      | 25,729  | L-selectin                                            |
| GF   | CSF1R     | 24,163  | Macrophage colony-stimulating factor 1 receptor       |
| CYT  | IL6ST     | 23,811  | Interleukin-6 receptor subunit beta                   |
| INF  | IL6R      | 23,412  | Interleukin-6 receptor subunit alpha                  |
| CHE  | CCL21     | 23,105  | C-C motif chemokine 21                                |
| INF  | TIMP2     | 22,795  | Metalloproteinase inhibitor 2                         |
| REC  | TNFRSF17  | 22,355  | Tumor necrosis factor receptor superfamily member 17  |
| CHE  | IFNL1     | 19,506  | Interferon lambda-1                                   |
| CYT  | CDH1      | 17,919  | Cadherin-1                                            |
| CYT  | IL13RA1   | 16,766  | Interleukin-13 receptor subunit alpha-1               |
| GF   | KDR       | 15,881  | Vascular endothelial growth factor receptor 2         |
| CYT  | TREM1     | 15,662  | Triggering receptor expressed on myeloid cells 1      |
| CYT  | CTSS      | 15,538  | Cathepsin S                                           |
| REC  | TNFRSF18  | 13,410  | Tumor necrosis factor receptor superfamily member 18  |
| CYT  | LGALS7    | 12,956  | Galectin-7                                            |
| CYT  | TNFRSF10D | 12,579  | Tumor necrosis factor receptor superfamily member 10D |
| CYT  | PDGFA     | 12,454  | Platelet-derived growth factor subunit A              |
| INF  | TNFRSF1A  | 12,348  | Tumor necrosis factor receptor superfamily member 1A  |
| GF   | TGFA      | 12,273  | Protransforming growth factor alpha                   |
| INF  | TIMP1     | 12,041  | Metalloproteinase inhibitor 1                         |
| GF   | FGF7      | 11,984  | Fibroblast growth factor 7                            |
| CYT  | IL2RB     | 11,830  | Interleukin-2 receptor subunit beta                   |
| CYT  | SERPINE1  | 11,194  | Plasminogen activator inhibitor 1                     |

|     |          |        |                                                      |
|-----|----------|--------|------------------------------------------------------|
| CHE | CXCL16   | 10,931 | C-X-C motif chemokine 16                             |
| INF | ICAM1    | 10,930 | Intercellular adhesion molecule 1                    |
| INF | CCL5     | 10,751 | C-C motif chemokine 5                                |
| INF | TNFRSF1B | 10,501 | Tumor necrosis factor receptor superfamily member 1B |
| GF  | NTF3     | 10,424 | Neurotrophin-3                                       |
| CHE | IL17F    | 9,879  | Interleukin-17F                                      |
| CHE | CCL14    | 8,462  | C-C motif chemokine 14                               |
| REC | PI3      | 8,259  | Elafin                                               |
| REC | PDGFRB   | 8,247  | Platelet-derived growth factor receptor beta         |
| CHE | CCL28    | 8,239  | C-C motif chemokine 28                               |
| CHE | IL18BP   | 7,960  | Interleukin-18-binding protein                       |
| CHE | CCL19    | 7,853  | C-C motif chemokine 19                               |
| INF | IL16     | 7,502  | Pro-interleukin-16                                   |
| CYT | INHBA    | 7,178  | Inhibin beta A chain                                 |
| REC | SCARB2   | 7,022  | Lysosome membrane protein 2                          |
| REC | ICAM3    | 6,991  | Intercellular adhesion molecule 3                    |
| CYT | ANGPT1   | 6,757  | Angiopoietin-1                                       |
| GF  | KIT      | 6,741  | Mast/stem cell growth factor receptor Kit            |
| REC | ALCAM    | 6,665  | CD166 antigen                                        |
| REC | PLAUR    | 6,647  | Urokinase plasminogen activator surface receptor     |
| REC | CNTN2    | 6,612  | Contactin-2                                          |
| REC | CD14     | 6,420  | Monocyte differentiation antigen CD14                |
| CYT | PARN     | 6,326  | Poly(A)-specific ribonuclease PARN                   |
| GF  | NGFR     | 6,284  | Tumor necrosis factor receptor superfamily member 16 |
| CHE | MST1     | 6,258  | Hepatocyte growth factor-like protein                |
| CYT | NRCAM    | 6,258  | Neuronal cell adhesion molecule                      |
| GF  | IGFBP1   | 6,101  | Insulin-like growth factor-binding protein 1         |
| REC | TYRO3    | 5,838  | Tyrosine-protein kinase receptor TYRO3               |
| CYT | TEK      | 5,792  | Angiopoietin-1 receptor                              |
| INF | CXCL9    | 5,743  | C-X-C motif chemokine 9                              |
| GF  | NTF4     | 5,576  | Neurotrophin-4                                       |
| REC | TNFRSF9  | 5,347  | Tumor necrosis factor receptor superfamily member 9  |
| REC | IL10RB   | 5,287  | Interleukin-10 receptor subunit beta                 |
| CHE | CCL27    | 5,141  | C-C motif chemokine 27                               |
| REC | PECAM1   | 5,051  | Platelet endothelial cell adhesion molecule          |
| CYT | RETN     | 4,998  | Resistin                                             |
| REC | ERBB3    | 4,987  | Receptor tyrosine-protein kinase erbB-3              |
| CHE | MIF      | 4,895  | Macrophage migration inhibitory factor               |
| INF | LTA      | 4,534  | Lymphotoxin-alpha                                    |
| GF  | EGFR     | 4,510  | Epidermal growth factor receptor                     |
| CYT | IL1RL1   | 4,376  | Interleukin-1 receptor-like 1                        |
| REC | LCN2     | 4,231  | Neutrophil gelatinase-associated lipocalin           |
| GF  | IGFBP6   | 4,086  | Insulin-like growth factor-binding protein 6         |
| CYT | IL17B    | 4,012  | Interleukin-17B                                      |
| CHE | CXCL11   | 3,998  | C-X-C motif chemokine 11                             |
| CHE | XCL1     | 3,946  | Lymphotactin                                         |
| GF  | FIGF     | 3,883  | Vascular endothelial growth factor D                 |

|     |           |       |                                                           |
|-----|-----------|-------|-----------------------------------------------------------|
| REC | CD80      | 3,874 | T-lymphocyte activation antigen CD80                      |
| CYT | CXCL12    | 3,873 | C-X-C motif chemokine 12                                  |
| GF  | TGFB3     | 3,557 | Transforming growth factor beta-3                         |
| REC | TNFRSF14  | 3,188 | Tumor necrosis factor receptor superfamily member 14      |
| GF  | GDNF      | 3,063 | Glial cell line-derived neurotrophic factor               |
| GF  | INS       | 3,020 | Insulin                                                   |
| CYT | DKK1      | 2,983 | Dickkopf-related protein 1                                |
| GF  | VEGFA     | 2,961 | Vascular endothelial growth factor A                      |
| REC | MOK       | 2,895 | MAPK/MAK/MRK overlapping kinase                           |
| INF | CCL1      | 2,893 | C-C motif chemokine 1                                     |
| REC | HAVCR1    | 2,844 | Hepatitis A virus cellular receptor 1                     |
| GF  | HGF       | 2,830 | Hepatocyte growth factor                                  |
| REC | SELE      | 2,816 | E-selectin                                                |
| REC | TNFRSF10C | 2,815 | Tumor necrosis factor receptor superfamily member 10C     |
| CYT | TGFB2     | 2,762 | Transforming growth factor beta-2                         |
| GF  | IGF1      | 2,745 | Insulin-like growth factor I                              |
| CYT | THPO      | 2,721 | Thrombopoietin                                            |
| CYT | ANG       | 2,705 | Angiogenin                                                |
| GF  | AREG      | 2,676 | Amphiregulin                                              |
| REC | TNFRSF21  | 2,674 | Tumor necrosis factor receptor superfamily member 21      |
| CYT | CED       | 2,572 | Diaphyseal Dysplasia 1                                    |
| INF | IL1A      | 2,482 | Interleukin-1 alpha                                       |
| INF | IL15      | 2,412 | Interleukin-15                                            |
| REC | MICA      | 2,364 | MHC class I polypeptide-related sequence A                |
| REC | ENG       | 2,181 | Endoglin                                                  |
| CHE | TSLP      | 2,173 | Thymic stromal lymphopoietin                              |
| INF | IL11      | 2,171 | Interleukin-11                                            |
| INF | CCL24     | 2,149 | C-C motif chemokine 24                                    |
| GF  | PDGF1     | 2,145 | Platelet-Derived Growth Factor A Chain                    |
| REC | CEACAM1   | 2,136 | Carcinoembryonic antigen-related cell adhesion molecule 1 |
| CHE | CXCL10    | 2,121 | C-X-C motif chemokine 10                                  |
| REC | LYVE1     | 2,111 | Lymphatic vessel endothelial hyaluronic acid receptor 1   |
| REC | IL17RA    | 2,081 | Interleukin-17 receptor A                                 |
| CYT | FCGR2B    | 2,076 | Low affinity Ig Fc region receptor II-b                   |
| INF | CCL11     | 1,995 | Eotaxin                                                   |
| GF  | BMP5      | 1,847 | Bone morphogenetic protein 5                              |
| CYT | FST       | 1,746 | Follistatin                                               |
| CHE | LIF       | 1,683 | Leukemia inhibitory factor                                |
| CYT | IL2RA     | 1,581 | Interleukin-2 receptor subunit alpha                      |
| CHE | AXL       | 1,571 | Tyrosine-protein kinase receptor UFO                      |
| CHE | CCL22     | 1,561 | C-C motif chemokine 22                                    |
| CHE | TNFSF14   | 1,521 | Tumor necrosis factor ligand superfamily member 14        |
| REC | FAS       | 1,424 | Tumor necrosis factor receptor superfamily member 6       |
| GF  | KITLG     | 1,366 | Kit ligand                                                |
| CHE | CXCL5     | 1,347 | C-X-C motif chemokine 5                                   |
| CYT | VEGFC     | 1,231 | Vascular endothelial growth factor C                      |
| CHE | IFNL2     | 1,121 | Interferon lambda-2                                       |

|     |         |       |                                                      |
|-----|---------|-------|------------------------------------------------------|
| REC | NRG1    | 1,025 | Pro-neuregulin-1, membrane-bound isoform             |
| INF | CCL3    | 986   | C-C motif chemokine 3                                |
| CHE | CCL16   | 949   | C-C motif chemokine 16                               |
| INF | IL1B    | 932   | Interleukin-1 beta                                   |
| CHE | CCL23   | 865   | Myeloid progenitor inhibitory factor                 |
| CYT | TDGF1   | 836   | Teratocarcinoma-derived growth factor 1              |
| CYT | EPCAM   | 806   | Epithelial cell adhesion molecule                    |
| GF  | HBEGF   | 793   | Proheparin-binding EGF-like growth factor            |
| INF | CSF3    | 780   | Granulocyte colony-stimulating factor                |
| CHE | CCL25   | 741   | C-C motif chemokine 25                               |
| GF  | FLT4    | 738   | Vascular endothelial growth factor receptor 3        |
| INF | IL1RN   | 729   | Interleukin-1 receptor antagonist protein            |
| REC | EDA2R   | 723   | Tumor necrosis factor receptor superfamily member 27 |
| CYT | CD40    | 703   | Tumor necrosis factor receptor superfamily member 5  |
| INF | CCL2    | 703   | C-C motif chemokine 2                                |
| CYT | SHH     | 695   | Sonic hedgehog protein                               |
| REC | TNFRSF8 | 678   | Tumor necrosis factor receptor superfamily member 8  |
| GF  | GH1     | 657   | Somatotropin                                         |
| INF | IL4     | 528   | Interleukin-4                                        |
| GF  | GDF15   | 519   | Growth/differentiation factor 15                     |
| REC | CD40LG  | 477   | CD40 ligand                                          |
| GF  | BDNF    | 464   | Brain-derived neurotrophic factor                    |
| CYT | AGRP    | 455   | Agouti-related protein                               |
| INF | CCL15   | 448   | C-C motif chemokine 15                               |
| GF  | PGF     | 426   | Placenta growth factor                               |
| GF  | NGF     | 383   | Beta-nerve growth factor                             |
| INF | IL7     | 375   | Interleukin-7                                        |
| CHE | CCL8    | 333   | C-C motif chemokine 8                                |
| GF  | FGF2    | 317   | Fibroblast growth factor 2                           |
| GF  | PROK1   | 317   | Prokineticin-1                                       |
| REC | IL1R1   | 290   | Interleukin-1 receptor type 1                        |
| INF | CXCL8   | 286   | Interleukin-8                                        |
| CHE | BTC     | 284   | Probetacellulin                                      |
| CHE | CCL17   | 274   | C-C motif chemokine 17                               |
| CHE | SDF1    | 264   | Stromal cell-derived factor 1                        |
| CHE | CCL18   | 240   | C-C motif chemokine 18                               |
| INF | IL17A   | 225   | Interleukin-17A                                      |
| CHE | PPBP    | 224   | Platelet basic protein                               |
| CHE | CCL7    | 185   | C-C motif chemokine 7                                |
| INF | IL12B   | 179   | Interleukin-12 subunit beta                          |
| REC | FLT3LG  | 168   | Fms-related tyrosine kinase 3 ligand                 |
| CHE | CXCL6   | 165   | C-X-C motif chemokine 6                              |
| CHE | CXCL1   | 145   | Growth-regulated alpha protein                       |
| CHE | CCL20   | 144   | C-C motif chemokine 20                               |
| INF | IL2     | 136   | Interleukin-2                                        |
| INF | CXCL13  | 132   | C-X-C motif chemokine 13                             |
| INF | TNF     | 121   | Tumor necrosis factor                                |

|     |           |     |                                                       |
|-----|-----------|-----|-------------------------------------------------------|
| REC | IL2RG     | 114 | Cytokine receptor common subunit gamma                |
| CYT | FASLG     | 105 | Tumor necrosis factor ligand superfamily member 6     |
| CHE | CCL13     | 99  | C-C motif chemokine 13                                |
| INF | IL5       | 80  | Interleukin-5                                         |
| GF  | TNFRSF11B | 76  | Tumor necrosis factor receptor superfamily member 11B |
| INF | CSF2      | 68  | Granulocyte-macrophage colony-stimulating factor      |
| INF | CCL4      | 55  | C-C motif chemokine 4                                 |
| INF | IFNG      | 54  | Interferon gamma                                      |
| GF  | EGF       | 42  | Pro-epidermal growth factor                           |
| INF | IL13      | 42  | Interleukin-13                                        |
| INF | CSF1      | 38  | Macrophage colony-stimulating factor 1                |
| INF | IL6       | 28  | Interleukin-6                                         |
| INF | IL10      | 18  | Interleukin-10                                        |
| INF | IL12A     | 14  | Interleukin-12 subunit alpha                          |

---

CHE = chemokine; CYT = cytokine; GF; growth factor; INF = inflammation; REC = receptor
