# Supplementary material for: 明治・大正期の女子労働政策(1)(山岡通〓,宮崎澄夫両教授退職記念号)
Source: MDPI journal article supplement (doi:10.3390/ijms232415908), 1989-03-01
Supplement: s1 [file s1]

**Table S1.** PRP characteristics

| PATIENT | AGE yo | WBC ( $10^3 \times \mu\text{l}$ ) | RBC ( $10^6 \times \mu\text{l}$ ) | PLT ( $10^3 \times \mu\text{l}$ ) |
|---------|--------|-----------------------------------|-----------------------------------|-----------------------------------|
| 1       | 56     | 0.05                              | 0.01                              | 326                               |
| 2       | 60     | 0.02                              | 0.02                              | 205                               |
| 3       | 52     | 0.01                              | 0.03                              | 235                               |
| 4       | 56     | 0.03                              | 0.01                              | 314                               |
| 5       | 62     | 0.01                              | 0.01                              | 292                               |
| 6       | 74     | 0.05                              | 0.03                              | 360                               |
| 7       | 62     | 0.01                              | 0.02                              | 239                               |
| 8       | 50     | 0.03                              | 0.00                              | 336                               |
| 9       | 50     | 0.02                              | 0.00                              | 276                               |
| 10      | 38     | 0.00                              | 0.00                              | 419                               |
| 11      | 32     | 0.02                              | 0.00                              | 365                               |
| 12      | 37     | 0.07                              | 0.01                              | 293                               |
| 13      | 68     | 0.00                              | 0.01                              | 287                               |
| 14      | 32     | 0.02                              | 0.01                              | 334                               |
| 15      | 74     | 0.08                              | 0.02                              | 375                               |
| 16      | 71     | 0.01                              | 0.01                              | 216                               |
| 17      | 85     | 0.01                              | 0.02                              | 471                               |
| 18      | 59     | 0.01                              | 0.02                              | 206                               |
| 19      | 74     | 0.00                              | 0.01                              | 284                               |
| 20      | 74     | 0.06                              | 0.01                              | 259                               |
| 21      | 41     | 0.08                              | 0.01                              | 383                               |
| 22      | 55     | 0.15                              | 0.01                              | 340                               |
| 23      | 49     | 0.06                              | 0.01                              | 319                               |
| 24      | 48     | 0.02                              | 0.02                              | 391                               |
| 25      | 52     | 0.04                              | 0.01                              | 297                               |
| 26      | 59     | 0.04                              | 0.02                              | 408                               |
| 27      | 82     | 0.12                              | 0.05                              | 392                               |
| 28      | 16     | 0.50                              | 0.07                              | 549                               |
| 29      | 47     | 1.64                              | 0.04                              | 485                               |
| MEAN    | 56     | 0.11                              | 0.02                              | 333                               |
| SD      | 16     | 0.30                              | 0.02                              | 83                                |

WBC = white blood cells; RBC = red blood cells; PLT = platelets
