# Supplementary material for: 明治・大正期の女子労働政策(1)(山岡通〓,宮崎澄夫両教授退職記念号)
Source: MDPI journal article supplement (doi:10.3390/ijms232415908), 1989-03-01
Supplement: s1 [file s1]

**Table S3.** Soluble factors in PRP-treated BMSCs

| TYPE | FACTOR   | pg/milion cells |         |         |         |        |                                                  |
|------|----------|-----------------|---------|---------|---------|--------|--------------------------------------------------|
|      |          | B1              | B2      | B3      | MEAN    | SD     |                                                  |
| GF   | IGFBP4   | 146,361         | 166,965 | 160,221 | 157,849 | 8,577  | Insulin-like growth factor-binding protein 4     |
| CHE  | PF4      | 118,491         | 127,082 | 177,384 | 140,985 | 25,975 | Platelet factor 4                                |
| GF   | IGFBP3   | 67,919          | 65,875  | 69,956  | 67,917  | 1,666  | Insulin-like growth factor-binding protein 3     |
| GF   | TGFB1    | 25,432          | 43,973  | 51,332  | 40,245  | 10,897 | Transforming growth factor beta-1                |
| INF  | TIMP2    | 37,691          | 43,548  | 37,878  | 39,706  | 2,718  | Metalloproteinase inhibitor 2                    |
| CHE  | IFNL1    | 25,976          | 26,330  | 49,299  | 33,869  | 10,912 | Interferon lambda-1                              |
| CYT  | INHBA    | 25,821          | 24,754  | 27,428  | 26,001  | 1,099  | Inhibin beta A chain                             |
| GF   | VEGFA    | 18,261          | 24,211  | 24,511  | 22,328  | 2,878  | Vascular endothelial growth factor A             |
| INF  | TIMP1    | 19,604          | 23,458  | 20,658  | 21,240  | 1,626  | Metalloproteinase inhibitor 1                    |
| CYT  | SERPINE1 | 20,131          | 20,479  | 16,545  | 19,052  | 1,778  | Plasminogen activator inhibitor 1                |
| GF   | BMP4     | 6,102           | 33,281  | 8,863   | 16,082  | 12,213 | Bone morphogenetic protein 4                     |
| GF   | IGFBP6   | 9,679           | 14,168  | 13,933  | 12,593  | 2,063  | Insulin-like growth factor-binding protein 6     |
| GF   | IGFBP2   | 5,173           | 7,631   | 10,814  | 7,873   | 2,309  | Insulin-like growth factor-binding protein 2     |
| CHE  | XCL1     | 5,106           | 6,558   | 9,243   | 6,969   | 1,714  | Lymphotactin                                     |
| CHE  | MIF      | 4,093           | 7,092   | 8,971   | 6,719   | 2,009  | Macrophage migration inhibitory factor           |
| CHE  | MST1     | 3,693           | 8,731   | 5,406   | 5,943   | 2,092  | Hepatocyte growth factor-like protein            |
| INF  | CCL5     | 5,185           | 6,404   | 5,895   | 5,828   | 500    | C-C motif chemokine 5                            |
| CHE  | CXCL16   | 4,085           | 5,879   | 6,742   | 5,569   | 1,107  | C-X-C motif chemokine 16                         |
| CHE  | CCL21    | 1,361           | 6,564   | 7,156   | 5,027   | 2,603  | C-C motif chemokine 21                           |
| INF  | TNFRSF1A | 5,067           | 5,022   | 4,075   | 4,721   | 458    | TNF receptor superfamily member 1A               |
| CHE  | CCL27    | 4,607           | 3,765   | 3,947   | 4,106   | 362    | C-C motif chemokine 27                           |
| CHE  | SPP1     | 2,646           | 3,255   | 5,516   | 3,806   | 1,235  | Osteopontin                                      |
| CHE  | CXCL11   | 2,144           | 3,428   | 5,800   | 3,791   | 1,514  | C-X-C motif chemokine 11                         |
| CYT  | ICAM2    | 192             | 4,048   | 4,472   | 2,904   | 1,926  | Intercellular adhesion molecule 2                |
| CHE  | CCL26    | 3,351           | 1,814   | 1,623   | 2,263   | 774    | C-C motif chemokine 26                           |
| CYT  | ANGPT1   | 2,234           | 2,211   | 2,087   | 2,177   | 65     | Angiopoietin-1                                   |
| CYT  | IL6ST    | 1,590           | 1,619   | 3,224   | 2,144   | 764    | Interleukin-6 receptor subunit beta              |
| CHE  | LIF      | 894             | 1,384   | 3,839   | 2,039   | 1,289  | Leukemia inhibitory factor                       |
| CHE  | CCL25    | 2,510           | 2,043   | 1,560   | 2,038   | 388    | C-C motif chemokine 25                           |
| CYT  | ANG      | 1,590           | 1,816   | 1,994   | 1,800   | 166    | Angiogenin                                       |
| CYT  | CTSS     | 1,308           | 1,775   | 1,703   | 1,595   | 205    | Cathepsin S                                      |
| CYT  | DKK1     | 1,182           | 2,074   | 1,385   | 1,547   | 382    | Dickkopf-related protein 1                       |
| GF   | HGF      | 632             | 1,850   | 1,899   | 1,460   | 586    | Hepatocyte growth factor                         |
| CHE  | TNFSF14  | 454             | 1,423   | 2,160   | 1,346   | 698    | TNF ligand superfamily member 14                 |
| CYT  | IL23A    | 645             | 1,270   | 1,467   | 1,127   | 350    | Interleukin-23 subunit alpha                     |
| GF   | KDR      | 607             | 1,327   | 1,426   | 1,120   | 365    | Vascular endothelial growth factor receptor 2    |
| REC  | PLAUR    | 1,300           | 879     | 1,158   | 1,112   | 175    | Urokinase plasminogen activator surface receptor |
| REC  | ALCAM    | 996             | 1,004   | 1,219   | 1,073   | 104    | CD166 antigen                                    |
| GF   | FGF7     | 235             | 1,518   | 1,447   | 1,066   | 589    | Fibroblast growth factor 7                       |
| CHE  | IFNL2    | 1,048           | 851     | 1,121   | 1,006   | 114    | Interferon lambda-2                              |
| INF  | CCL2     | 1,193           | 744     | 753     | 897     | 209    | C-C motif chemokine 2                            |
| CHE  | CXCL10   | 664             | 725     | 1,080   | 823     | 183    | C-X-C motif chemokine 10                         |
| CHE  | BTC      | 387             | 995     | 717     | 700     | 249    | Probetacellulin                                  |
| CYT  | CDH1     | 169             | 108     | 1,786   | 687     | 777    | Cadherin-1                                       |

|     |           |     |     |     |     |     |                                               |
|-----|-----------|-----|-----|-----|-----|-----|-----------------------------------------------|
| CYT | FST       | 592 | 778 | 665 | 679 | 77  | Follistatin                                   |
| CHE | AXL       | 443 | 577 | 991 | 670 | 233 | Tyrosine-protein kinase receptor UFO          |
| GF  | GDF15     | 466 | 729 | 721 | 639 | 122 | Growth/differentiation factor 15              |
| CHE | CCL28     | 955 | 25  | 864 | 615 | 419 | C-C motif chemokine 28                        |
| CYT | CED       | 747 | 468 | 621 | 612 | 114 | Diaphyseal Dysplasia 1                        |
| INF | CXCL8     | 520 | 720 | 424 | 555 | 123 | Interleukin-8                                 |
| INF | IL6       | 625 | 578 | 382 | 528 | 105 | Interleukin-6                                 |
| INF | IL1RN     | 502 | 545 | 481 | 509 | 27  | Interleukin-1 receptor antagonist protein     |
| GF  | IGFBP1    | 150 | 442 | 763 | 452 | 250 | Insulin-like growth factor-binding protein 1  |
| CYT | IL17B     | 101 | 533 | 630 | 421 | 230 | Interleukin-17B                               |
| INF | IL6R      | 328 | 361 | 456 | 382 | 54  | Interleukin-6 receptor subunit alpha          |
| CYT | IL2RB     | 193 | 655 | 275 | 374 | 202 | Interleukin-2 receptor subunit beta           |
| GF  | NTF4      | 140 | 452 | 456 | 349 | 148 | Neurotrophin-4                                |
| GF  | AREG      | 38  | 356 | 604 | 333 | 231 | Amphiregulin                                  |
| GF  | NTF3      | 24  | 314 | 561 | 300 | 219 | Neurotrophin-3                                |
| CHE | CXCL12    | 274 | 254 | 302 | 277 | 20  | C-X-C motif chemokine 12                      |
| INF | IL1A      | 231 | 380 | 208 | 273 | 76  | Interleukin-1 alpha                           |
| INF | TNFRSF1B  | 180 | 297 | 299 | 259 | 56  | TNF receptor superfamily member 1B            |
| GF  | EGFR      | 167 | 268 | 268 | 234 | 48  | Epidermal growth factor receptor              |
| GF  | FIGF      | 193 | 262 | 220 | 225 | 28  | Vascular endothelial growth factor D          |
| REC | SCARB2    | 239 | 209 | 193 | 214 | 19  | Lysosome membrane protein 2                   |
| INF | ICAM1     | 180 | 177 | 219 | 192 | 19  | Intercellular adhesion molecule 1             |
| REC | CD14      | 243 | 112 | 196 | 184 | 54  | Monocyte differentiation antigen CD14         |
| CHE | CCL8      | 126 | 105 | 196 | 142 | 39  | C-C motif chemokine 8                         |
| CHE | CCL7      | 138 | 122 | 164 | 141 | 17  | C-C motif chemokine 7                         |
| INF | IL16      | 147 | 236 | 28  | 137 | 85  | Pro-interleukin-16                            |
| INF | CXCL9     | 82  | 174 | 154 | 137 | 40  | C-X-C motif chemokine 9                       |
| CHE | CCL20     | 106 | 152 | 135 | 131 | 19  | C-C motif chemokine 20                        |
| CYT | VEGFC     | 80  | 183 | 108 | 124 | 44  | Vascular endothelial growth factor C          |
| INF | CCL1      | 93  | 92  | 161 | 115 | 33  | C-C motif chemokine 1                         |
| INF | CSF2      | 213 | 45  | 79  | 112 | 73  | GM colony-stimulating factor                  |
| GF  | TNFRSF11B | 100 | 127 | 84  | 104 | 18  | TNF receptor superfamily member 11B           |
| INF | IL15      | 82  | 132 | 92  | 102 | 21  | Interleukin-15                                |
| GF  | PGF       | 51  | 122 | 127 | 100 | 35  | Placenta growth factor                        |
| CYT | SDF1      | 43  | 79  | 143 | 88  | 42  | Stromal cell-derived factor 1                 |
| CHE | PPBP      | 82  | 91  | 76  | 83  | 6   | Platelet basic protein                        |
| REC | FAS       | 89  | 74  | 76  | 80  | 7   | TNF receptor superfamily member 6             |
| CYT | SIGLEC5   | 36  | 37  | 142 | 72  | 50  | Sialic acid-binding Ig-like lectin 5          |
| GF  | PROK1     | 57  | 78  | 80  | 72  | 10  | Prokineticin-1                                |
| INF | IL2       | 35  | 77  | 99  | 70  | 27  | Interleukin-2                                 |
| CYT | LGALS7    | 35  | 139 | 35  | 70  | 49  | Galectin-7                                    |
| GF  | FLT4      | 24  | 107 | 49  | 60  | 34  | Vascular endothelial growth factor receptor 3 |
| INF | IFNG      | 54  | 23  | 99  | 59  | 31  | Interferon gamma                              |
| CHE | CCL18     | 41  | 52  | 81  | 58  | 17  | C-C motif chemokine 18                        |
| INF | IL1B      | 63  | 60  | 45  | 56  | 8   | Interleukin-1 beta                            |
| CYT | CD40      | 32  | 17  | 115 | 55  | 43  | TNF receptor superfamily member 5             |
| CHE | CCL17     | 7   | 50  | 75  | 44  | 28  | C-C motif chemokine 17                        |

|     |          |    |    |    |    |    |                                        |
|-----|----------|----|----|----|----|----|----------------------------------------|
| CYT | EPCAM    | 47 | 24 | 48 | 40 | 11 | Epithelial cell adhesion molecule      |
| INF | CSF3     | 56 | 24 | 32 | 38 | 14 | Granulocyte colony-stimulating factor  |
| CHE | CCL13    | 8  | 29 | 67 | 34 | 24 | C-C motif chemokine 13                 |
| CYT | IL2RA    | 30 | 59 | 11 | 34 | 20 | Interleukin-2 receptor subunit alpha   |
| GF  | GH1      | 33 | 25 | 42 | 34 | 7  | Somatotropin                           |
| CHE | CCL14    | 5  | 22 | 72 | 33 | 29 | C-C motif chemokine 14                 |
| REC | ENG      | 38 | 20 | 12 | 23 | 11 | Endoglin                               |
| INF | CSF1     | 32 | 22 | 12 | 22 | 8  | Macrophage colony-stimulating factor 1 |
| REC | TNFRSF21 | 32 | 13 | 16 | 20 | 8  | TNF receptor superfamily member 21     |
| GF  | BDNF     | 13 | 21 | 18 | 17 | 3  | Brain-derived neurotrophic factor      |
| INF | CCL4     | 5  | 6  | 4  | 5  | 1  | C-C motif chemokine 4                  |
| CHE | CCL16    | 2  | 5  | 6  | 4  | 2  | C-C motif chemokine 16                 |
| INF | IL12A    | 2  | 4  | 2  | 3  | 1  | Interleukin-12 subunit alpha           |
| INF | CXCL13   | 3  | 2  | 2  | 2  | 0  | C-X-C motif chemokine 13               |

---

CHE = chemokine; CYT = cytokine; GF; growth factor; INF = inflammation; REC = receptor
