# Supplementary material for: 明治・大正期の女子労働政策(1)(山岡通〓,宮崎澄夫両教授退職記念号)
Source: MDPI journal article supplement (doi:10.3390/ijms232415908), 1989-03-01
Supplement: s1 [file s1]

Table S6 - Experimentally validated targets for first quartile EV-miRNAs

| miRNA          | hsa-miR-24-3p | hsa-miR-193b-3p | hsa-miR-222-3p | hsa-miR-574-3p | hsa-miR-191-5p |
|----------------|---------------|-----------------|----------------|----------------|----------------|
| Weight %       | 20.12         | 11.35           | 10.08          | 6.76           | 6.73           |
| <b>Targets</b> | ABCB9         | AKR1C2          | ABCG2          | CLTC           | BASP1          |
|                | ACVR1B        | CCND1           | ADAM1A         | CUL2           | CCND2          |
|                | AGPAT2        | ESR1            | ARID1A         | EGFR           | CDK6           |
|                | ARHGAP19      | ETS1            | BBC3           | EP300          | CDK9           |
|                | ATG4A         | KIT             | BMF            | RAC1           | CEBPB          |
|                | AURKB         | KRAS            | CDKN1B         | RXRA           | CTDSP2         |
|                | BCAR1         | MAX             | CDKN1C         | SMAD4          | EGR1           |
|                | BCL2L11       | MCL1            | CERS2          | TGFB1          | IL1A           |
|                | BRCA1         | MYB             | CORO1A         |                | LRRC8A         |
|                | CARD10        | NF1             | DICER1         |                | MDM4           |
|                | CCNA2         | PLAU            | DIRAS3         |                | NDST1          |
|                | CCND1         | PRAP1           | DKK2           |                | NOTCH2         |
|                | CDK1          | RAD51           | ESR1           |                | RPS6KA3        |
|                | CDK4          | SHMT2           | ETS1           |                | SATB1          |
|                | CDKN1B        | SMAD3           | FOS            |                | SLC16A2        |
|                | CDKN2A        | YWHAZ           | FOXO1          |                | SOX4           |
|                | CHEK1         |                 | FOXO3          |                | TMC7           |
|                | COPS5         |                 | GAS5           |                | YBX3           |
|                | CORO1A        |                 | GJA1           |                |                |
|                | CYP11B2       |                 | GNAI2          |                |                |
|                | DEDD          |                 | GNAI3          |                |                |
|                | DHFR          |                 | GRB10          |                |                |
|                | DHFRP1        |                 | ICAM1          |                |                |
|                | DND1          |                 | KIT            |                |                |
|                | DYRK2         |                 | MGMT           |                |                |
|                | E2F2          |                 | MMP1           |                |                |
|                | EIF2S3        |                 | PLXNC1         |                |                |
|                | FAF1          |                 | PPP2R2A        |                |                |
|                | FBXW7         |                 | PRDM1          |                |                |
|                | FEN1          |                 | PTEN           |                |                |
|                | FGF11         |                 | RECK           |                |                |
|                | FGFR3         |                 | RUNX2          |                |                |
|                | FSCN1         |                 | SELE           |                |                |
|                | FURIN         |                 | SMAD5          |                |                |
|                | GATA3         |                 | SOD2           |                |                |
|                | H2AFX         |                 | SSSCA1         |                |                |
|                | HMOX1         |                 | SSX2IP         |                |                |
|                | HNF4A         |                 | STAT5A         |                |                |
|                | IFNG          |                 | TCEAL1         |                |                |
|                | IFNR          |                 | TIMP3          |                |                |
|                | IL4           |                 | TMED7          |                |                |
|                | INSIG1        |                 | TNFSF10        |                |                |
|                | JPH2          |                 | TP53           |                |                |
|                | LDHA          |                 | TRPS1          |                |                |
|                | LDHB          |                 | VGLL4          |                |                |
|                | MAFB          |                 |                |                |                |

MAP3K9  
MAPK14  
MAPK7  
MEN1  
MLEC  
MMP14  
MT1M  
MXI1  
MYC  
NCAN  
NCSTN  
NDST1  
NOS3  
NOTCH1  
PAK4  
PCNA  
PDGFRB  
POLD1  
PRDX6  
PRKCH  
PSAP  
PTPN9  
PTPRF  
REG4  
S100A8  
SH3PXD2A  
SLC6A4  
SP1  
SSSCA1  
ST7L  
STX16  
TACC3  
TGFB1  
TMED7  
TMEM92  
TNK2  
TP53  
TRIB3  
TRIM11  
WNT4  
XIAP  
ZNF217

| hsa-miR-320a-3p | hsa-miR-484 | hsa-miR-197-3p | hsa-miR-125b-5p | hsa-miR-99a-5p |
|-----------------|-------------|----------------|-----------------|----------------|
| 4.20            | 3.56        | 1.85           | 1.73            | 1.54           |
| ABCG2           | FIS1        | BMF            | ABTB1           | AGO2           |
| AQP1            | SMAD2       | CD82           | AHRR            | AKT1           |
| AQP4            | ZEB1        | FOXJ2          | AKT1            | ARID3A         |
| AR              |             | FOXO3          | ALOX5           | CAPNS1         |
| ARF1            |             | MAPK1          | ANGPT2          | CTDSPL         |
| ARPP19          |             | MTHFD1         | APC             | FGFR3          |
| BANP            |             | NSUN5          | APLN            | FKBP5          |
| BMI1            |             | PMAIP1         | ARID3A          | GSK3B          |
| CDK6            |             | RAN            | ARID3B          | HOXA1          |
| CRKL            |             | TUSC2          | BAK1            | IGF1R          |
| CTNNB1          |             |                | BBC3            | MTMR3          |
| ESRRG           |             |                | BCL2            | MTOR           |
| FAS             |             |                | BCL2L2          | NOX4           |
| FH              |             |                | BCL3            | RAVER2         |
| FOXM1           |             |                | BMF             | SERPINE1       |
| GNAI1           |             |                | BMPR1B          | SMARCA5        |
| HMGB1           |             |                | BTG2            | TRIB2          |
| HOXA10          |             |                | CBFB            |                |
| HSPB6           |             |                | CCNJ            |                |
| IGF1R           |             |                | CD44            |                |
| ITGB3           |             |                | CDH5            |                |
| KITLG           |             |                | CDKN2A          |                |
| MAPK1           |             |                | CDKN2D          |                |
| MCL1            |             |                | CEBPA           |                |
| MTDH            |             |                | CGN             |                |
| MYC             |             |                | CSNK2A1         |                |
| NFATC3          |             |                | CYP24A1         |                |
| NOD2            |             |                | DGAT1           |                |
| NPR1            |             |                | DKK3            |                |
| NRP1            |             |                | DRAM2           |                |
| PBX3            |             |                | DUSP6           |                |
| PDCD4           |             |                | E2F2            |                |
| PICSAR          |             |                | E2F3            |                |
| POLR3D          |             |                | EGFR            |                |
| PTEN            |             |                | EIF4EBP1        |                |
| RAB11A          |             |                | EIF5A2          |                |
| RAB14           |             |                | ENPEP           |                |
| RAC1            |             |                | EPO             |                |
| RUNX2           |             |                | EPOR            |                |
| SUZ12           |             |                | ERBB2           |                |
| TAC1            |             |                | ERBB3           |                |
| TFRC            |             |                | ETS1            |                |
| TRPC5           |             |                | Fas             |                |
| USP14           |             |                | FES             |                |
| VDAC1           |             |                | FGFR2           |                |
| VEGFA           |             |                | FZD6            |                |

VIM  
YWHAZ

GAB2  
GLI1  
GRIN2A  
GSS  
HK2  
HMGA1  
HMGA2  
HOTTIP  
ICAM2  
IGF1R  
IGF2  
IKZF2  
IKZF3  
IKZF4  
IL6R  
IRF4  
JAK2  
KLC2  
KLF13  
LACTB  
LIFR  
LIN28A  
LIN28B  
LIPA  
MAN1B1  
MAP3K11  
MAPK14  
MCL1  
MEGF9  
MMP13  
MMP2  
MMP26  
MUC1  
MXD1  
NCOR2  
NES  
NEU1  
NKIRAS2  
NTRK3  
PCTP  
PHF8  
PIAS3  
PIGF  
PIK3CB  
PIK3CD  
PODXL  
PPP1CA  
PRDM1  
PRKRA  
PTH1R

RAF1  
RPS6KA1  
SCNN1A  
SEMA4C  
SET  
SFRP5  
SGPL1  
SIRT7  
SMAD4  
SMO  
SPHK1  
STARD13  
STAT3  
SUV39H1  
TBC1D1  
TET2  
TNF  
TNFAIP3  
TP53  
TP53INP1  
VDR  
VPS4B  
VPS51

| hsa-miR-145-5p | hsa-miR-19b-3p | hsa-miR-214-3p | hsa-miR-21-5p | hsa-miR-342-3p |
|----------------|----------------|----------------|---------------|----------------|
| 1.49           | 1.49           | 1.45           | 1.09          | 1.07           |
| ABCC1          | ARID4B         | ALPK2          | ABCB1         | BIRC6          |
| ABHD17C        | ATXN1          | ARL2           | AKT2          | BMP7           |
| ABRACL         | BACE1          | ASF1B          | ANKRD46       | CTBP2          |
| ACTB           | BCL2L11        | ATF4           | ANP32A        | DNMT1          |
| ADAM17         | BCL3           | BAX            | APAF1         | E2F1           |
| ADD3           | BMPR2          | BCL2L11        | BASP1         | GEMIN4         |
| AKR1B10        | CUL5           | BCL2L2         | BCL10         | ID4            |
| ALDH3A1        | CYP19A1        | BIRC5          | BCL2          | IKBKG          |
| ALPPL2         | DNMT1          | CADM1          | BCL6          | MTDH           |
| ANGPT2         | ESR1           | CCL5           | BMI1          | SREBF1         |
| AP1G1          | GCM1           | CD274          | BMPR2         | SREBF2         |
| APH1A          | HIPK1          | CDK6           | BTG2          | TAB2           |
| ARF6           | HIPK3          | CPD            | CADM1         | TAB3           |
| ARL6IP5        | KAT2B          | CTNNB1         | CASC2         |                |
| BNIP3          | MTUS1          | EZH2           | CASP8         |                |
| BRAF           | MXD1           | FGFR1          | CBX4          |                |
| C11orf65       | MYCN           | GALNT7         | CCL20         |                |
| CAMK1D         | MYLIP          | GSR            | CCR1          |                |
| CBFB           | NCOA3          | HDGF           | CDC25A        |                |
| CCDC43         | PITX1          | ING4           | CDK2AP1       |                |
| CD28           | PKNOX1         | JAG1           | CEBPB         |                |
| CD40           | PPP2R5E        | LTF            | CLU           |                |
| CD44           | PRKAA1         | LZTS1          | COL4A1        |                |
| CDH2           | PTEN           | MAP2K3         | COX2          |                |
| CDK4           | SMAD4          | MAPK1          | DAXX          |                |
| CDK6           | SOCS1          | MAPK8          | DDAH1         |                |
| CDKN1A         | TGFBR2         | MEF2C          | DERL1         |                |
| CEP19          | TLR2           | NRAS           | DNM1L         |                |
| CFTR           | TNFAIP3        | PAPPA          | DOCK4         |                |
| CLINT1         | TP53           | PIM1           | DOCK5         |                |
| COL5A1         |                | PLXNB1         | DOCK7         |                |
| CPEB4          |                | POR            | DUSP10        |                |
| CRNDE          |                | POU4F2         | E2F1          |                |
| CTGF           |                | PSMD10         | EGFR          |                |
| CTNND1         |                | PTEN           | EGLN1         |                |
| DDC            |                | QKI            | EIF4A2        |                |
| DDX17          |                | RAB15          | ERBB2         |                |
| DDX6           |                | SEMA4D         | FASLG         |                |
| DFFA           |                | SRGAP1         | FBXO11        |                |
| DTD1           |                | SRGAP2         | FMOD          |                |
| E2F3           |                | SUFU           | FOXO1         |                |
| EGFR           |                | TP53           | FZD6          |                |
| EIF4E          |                | TWIST1         | GAS5          |                |
| EPAS1          |                | UBE2I          | GDF5          |                |
| ERG            |                | XBP1           | HMGB1         |                |
| ESR1           |                |                | HNRNPK        |                |

|         |          |
|---------|----------|
| ETS1    | HPGD     |
| F11R    | ICAM1    |
| FAM3C   | ICOSLG   |
| FAM45A  | IGF1R    |
| FLI1    | IL12A    |
| FSCN1   | IL1B     |
| FXN     | IRAK1    |
| FZD7    | ISCU     |
| GMFB    | JAG1     |
| GOLM1   | JMY      |
| HDAC11  | LRP6     |
| HDAC2   | LRRFIP1  |
| HLTF    | MAP2K3   |
| HMGA2   | MARCKS   |
| HOXA9   | MEF2C    |
| IFNB1   | MSH2     |
| IGF1R   | MSH6     |
| ILK     | MSLN     |
| IRS1    | MTAP     |
| IRS2    | MYD88    |
| ITGB8   | NAV3     |
| JADE1   | NCAPG    |
| JAG1    | NCOA3    |
| KLF4    | NFIA     |
| KLF5    | NFIB     |
| KREMEN1 | NTF3     |
| LYPLA2  | OXTR     |
| MAP2K6  | PCBP1    |
| MCM2    | PCGF2    |
| MDM2    | PDCD4    |
| MEST    | PIAS3    |
| MIXL1   | PIK3R1   |
| MMP1    | PLAT     |
| MMP12   | PLOD3    |
| MMP14   | PPARA    |
| MSH3    | PPIF     |
| MTDH    | PSMD9    |
| MTMR14  | PTEN     |
| MUC1    | PTPN14   |
| MYC     | PTX3     |
| MYO5A   | RASA1    |
| MYO6    | RASGRP1  |
| MYOCD   | RECK     |
| MYRF    | REST     |
| NAIP    | RHO      |
| NANOG   | RHOB     |
| NDRG2   | RPS7     |
| NDUFA4  | RTN4     |
| NEDD9   | SATB1    |
| NFATC1  | SERPINB5 |

NIPSNAP1  
NRAS  
NUDT1  
PAK4  
PARP8  
PIGF  
PODXL  
POU5F1  
PPM1D  
PPP3CA  
PTP4A2  
PXN  
ROBO2  
ROCK1  
RPA1  
RPS6KB1  
RREB1  
RTKN  
SENP1  
SERINC5  
SERPINE1  
SET  
SMAD2  
SMAD3  
SOCS7  
SOX2  
SOX9  
SP1  
SP7  
SPTBN1  
SPTLC1  
SRGAP1  
STAT1  
SWAP70  
TGFB2  
TGFB2  
TIRAP  
TMEM9B  
TMOD3  
TNFSF13  
TPM3  
TPRG1  
TSPAN6  
TUG1  
VEGFA  
VPS51  
YES1

SERPINI1  
SETD2  
SIRT2  
SMAD7  
SMARCA4  
SMN1  
SOCS1  
SOCS6  
SOD3  
SOX2  
SOX5  
SP1  
SPRY2  
STAT3  
STUB1  
TAP1  
TCF21  
TGFB2  
TGFB1  
TGFB2  
TGFB2  
TGIF1  
TIAM1  
TICAM2  
TIMP3  
TLR3  
TM9SF3  
TNFAIP3  
TNFRSF10B  
TOPORS  
TP53BP2  
TP63  
TPM1  
TRAF7  
UBE2N  
VEGFA  
VHL  
WWP1  
YOD1



| hsa-miR-132-3p | hsa-miR-16-5p | hsa-miR-523-3p | hsa-miR-409-3p | hsa-miR-221-3p | hsa-miR-636 |
|----------------|---------------|----------------|----------------|----------------|-------------|
| 1.01           | 1.00          | 0.98           | 0.84           | 0.83           | 0.79        |
| AGO2           | ACVR2A        |                | AKT1           | ADAM1A         | SLC25A5     |
| ARHGAP32       | ADORA2A       |                | ANG            | ADAMTS6        |             |
| BDNF           | AKT3          |                | CTNND1         | ANXA1          |             |
| CCNA2          | APP           |                | ELF2           | APAF1          |             |
| CCNB1          | ARHGDIA       |                | FGA            | ARF4           |             |
| CDKN1A         | ARL2          |                | FGB            | ARIH2          |             |
| CRK            | AXIN2         |                | FGG            | ARNT           |             |
| EGFR           | BACE1         |                | FRAT1          | ASZ1           |             |
| FOXO1          | BCL2          |                | GAB1           | BBC3           |             |
| GDF5           | BDNF          |                | IFNG           | BCL2L11        |             |
| HBEGF          | BIRC5         |                | MET            | BECN1          |             |
| IRAK4          | BMI1          |                | MGMT           | BMF            |             |
| JPT1           | BRCA1         |                | NLK            | BNIP3          |             |
| KLHL11         | CADM1         |                | PHF10          | BNIP3L         |             |
| MAPK1          | CAPRIN1       |                | RDX            | BRAP           |             |
| MMP9           | CCND1         |                | RECK           | CDKN1B         |             |
| MUC13          | CCND2         |                | RSU1           | CDKN1C         |             |
| PIK3R3         | CCND3         |                | STAG2          | CERS2          |             |
| RAF1           | CCNE1         |                | UGT2B17        | CORO1A         |             |
| RASA1          | CCNT2         |                | ZEB1           | CREBZF         |             |
| RB1            | CDK6          |                |                | CTCF           |             |
| SIRT1          | CDS2          |                |                | CXCL12         |             |
| SLC2A1         | CHEK1         |                |                | DDIT4          |             |
| SMAD2          | CHUK          |                |                | DICER1         |             |
| SOX4           | CLDN2         |                |                | DIRAS3         |             |
| SOX5           | FGF2          |                |                | DKK2           |             |
| SOX6           | FGFR1         |                |                | DVL2           |             |
| SPRED1         | GLS2          |                |                | ESR1           |             |
| SPRY1          | HDGF          |                |                | ETS1           |             |
| TJAP1          | HGF           |                |                | FMR1           |             |
| TLN2           | HMGA1         |                |                | FOS            |             |
| YY1AP1         | HMGA2         |                |                | FOXO3          |             |
|                | IFNG          |                |                | GJA1           |             |
|                | IGF1R         |                |                | GRB10          |             |
|                | IL12B         |                |                | HECTD2         |             |
|                | KDR           |                |                | HMGXB4         |             |
|                | KRAS          |                |                | HOXB5          |             |
|                | MAP7          |                |                | ICAM1          |             |
|                | METTTL13      |                |                | KIT            |             |
|                | MTOR          |                |                | MBD2           |             |
|                | MYB           |                |                | MDM2           |             |
|                | NCOR2         |                |                | MEOX2          |             |
|                | NCSTN         |                |                | MGMT           |             |
|                | OPRM1         |                |                | MMP2           |             |
|                | PIM1          |                |                | MYBL1          |             |
|                | PPM1D         |                |                | NAIP           |             |

|         |         |
|---------|---------|
| PRDM4   | PAK1    |
| PTGS2   | PIK3R1  |
| PURA    | PTEN    |
| RAF1    | RAB1A   |
| RECK    | RAD51   |
| RICTOR  | RB1     |
| RPS6KB1 | RECK    |
| SLC6A4  | RUNX1   |
| SOCS3   | SELE    |
| SOX5    | SIRT1   |
| SOX6    | SOCS1   |
| TP53    | SOCS3   |
| TPPP3   | SSX2IP  |
| UCA1    | STAT5A  |
| UNG     | STMN1   |
| VEGFA   | TBK1    |
| WEE1    | TCEAL1  |
| WNT3A   | TICAM1  |
| WNT4    | TIMP3   |
| YAP1    | TMED7   |
| ZYX     | TNFSF10 |
|         | TP53    |
|         | TRPS1   |
|         | USP18   |
|         | WEE1    |
|         | ZEB2    |

| hsa-let-7b-5p | hsa-miR-210-3p | hsa-miR-29a-3p | hsa-miR-30b-5p | hsa-miR-106a-5p | hsa-miR-17-5p |
|---------------|----------------|----------------|----------------|-----------------|---------------|
| 0.78          | 0.78           | 0.72           | 0.64           | 0.61            | 0.61          |
| ACTG1         | AIFM3          | ABL1           | ATG12          | APC             | ABCA1         |
| ACVR1         | ALDH5A1        | ADAM12         | BCL2           | APP             | ADAR          |
| AGO1          | ATG7           | ADAMTS9        | BCL6           | ARID4B          | APP           |
| AKT2          | BDNF           | AHR            | BCL9           | ATG7            | BCL2          |
| ANAPC1        | BNIP3          | AKT2           | BECN1          | ATM             | BCL2L11       |
| CCNA1         | BTK            | AKT3           | CAT            | BCL10           | BMP2          |
| CCNA2         | CASP8AP2       | ALDH5A1        | CCNE2          | BMP2            | BMPR2         |
| CCND1         | COL4A2         | ATG9A          | CTHRC1         | CASP7           | BRCA2         |
| CCND2         | CPEB2          | BACE1          | DLL4           | CCND1           | CCL1          |
| CDC25A        | DDAH1          | BCL2           | DNMT1          | CDKN1A          | CCND1         |
| CDC34         | DIMT1          | BCL7A          | EIF2S1         | CDX2            | CCND2         |
| CDK6          | E2F3           | CACNA1C        | EIF5A2         | CXCL8           | CDKN1A        |
| COL3A1        | EFNA3          | CALCR          | ERG            | CYP19A1         | CLOCK         |
| CPEB1         | EHD2           | CCND1          | HOXA1          | E2F1            | CLU           |
| CPEB3         | FGFRL1         | CCND2          | MBNL1          | ERCC1           | CYP7B1        |
| CPEB4         | FOXN3          | CCNT2          | MBNL2          | FAS             | DAPK3         |
| CTHRC1        | FOXP3          | CD276          | MBNL3          | FASTK           | DNAJC27       |
| CYP2J2        | GPD1L          | CD93           | NOTCH1         | HIF1A           | DNMT1         |
| E2F2          | HIF1A          | CDC42          | PDGFRB         | HIPK3           | E2F1          |
| EZH2          | HIF3A          | CDC7           | RASAL2         | HMGA2           | E2F3          |
| HMGA1         | HOXA1          | CDK2           | RUNX2          | IL10            | EGR2          |
| HMGA2         | HOXA9          | CDK4           | SERPINE1       | LIMK1           | EPAS1         |
| HRAS          | HSD17B1        | CDK6           | SIX1           | MAPK9           | ETV1          |
| IFNB1         | IGFBP3         | CEACAM6        | SMAD1          | MFN2            | FBXO31        |
| IGF1R         | INPP5A         | CLDN1          | SNAI1          | MGST2           | GPR137B       |
| IGF2BP1       | ISCU           | COL10A1        | SOCS1          | MYB             | HBP1          |
| IGF2BP2       | KCMF1          | COL1A2         | TP53           | MYLIP           | HIF1A         |
| IRS2          | LDHA           | COL3A1         |                | PTEN            | HSPB2         |
| LGR4          | LDHB           | COL4A1         |                | RARB            | ICAM1         |
| LIN28A        | MCM3           | COL4A2         |                | RB1             | IGFBP3        |
| LIN28B        | MNT            | COL5A2         |                | RBL2            | ITGB8         |
| LRIG1         | MRE11          | CPEB3          |                | RND3            | JAK1          |
| MTPN          | NCAM1          | CPEB4          |                | RUNX1           | KAT2B         |
| NR2E1         | NDUFA4         | CYP2C19        |                | RUNX3           | LDLR          |
| NRAS          | NPTX1          | DICER1         |                | SIRPA           | LIMK1         |
| PDGFRA        | P4HB           | DKK1           |                | SLC2A3          | MAP3K12       |
| PRDM1         | PIM1           | DNMT1          |                | STAT3           | MAPK9         |
| RDH10         | PLK1           | DNMT3A         |                | TGFBR2          | MDM2          |
| RPIA          | PTBP3          | DNMT3B         |                | TIMP2           | MEF2D         |
| TGFBR1        | PTPN1          | ELN            |                | ULK1            | MFN2          |
| TLR4          | PTPN2          | FBN1           |                | VEGFA           | MMP2          |
| TNFRSF10B     | RAD52          | FGA            |                |                 | MYC           |
|               | SDHD           | FGB            |                |                 | NABP1         |
|               | SH3BGRL        | FGG            |                |                 | NCOA3         |
|               | STMN1          | FOXO3          |                |                 | NPAS3         |
|               | TFRC           | FSTL1          |                |                 | NPAT          |

|         |          |          |
|---------|----------|----------|
| THSD7A  | GLUL     | PDLIM7   |
| TP53I11 | GPR85    | PHLPP1   |
| TWIST1  | GSK3B    | PKD2     |
| VMP1    | HBP1     | PKNOX1   |
| XIST    | HMGCR    | PPP2R2A  |
| XPA     | IFNAR1   | PTEN     |
|         | IGF1     | PTPRO    |
|         | IMPDH1   | RAD21    |
|         | ITGA11   | RB1      |
|         | ITGA6    | RBL1     |
|         | ITGB1    | RBL2     |
|         | ITIH5    | RND3     |
|         | KDM5B    | RUNX1    |
|         | KEAP1    | SELE     |
|         | KLF4     | SIRPA    |
|         | KREMEN2  | SMAD4    |
|         | LAMC2    | SMURF1   |
|         | LOX      | SOCS6    |
|         | LPL      | STAT3    |
|         | MCL1     | TBC1D2   |
|         | MMP2     | TCEAL1   |
|         | MUC1     | TCF3     |
|         | MYC      | TGFBR2   |
|         | MYCN     | TIMP3    |
|         | NASP     | TLR7     |
|         | NAV3     | TNF      |
|         | NFIA     | TNFSF12  |
|         | NMI      | TP53COR1 |
|         | PDGFRB   | TP53INP1 |
|         | PER1     | TRIM8    |
|         | PIK3R1   | UBE2C    |
|         | PPM1D    | VEGFA    |
|         | PPP1R13B | VLDLR    |
|         | PTEN     | WEE1     |
|         | PXDN     | YES1     |
|         | QKI      | ZBTB4    |
|         | RAN      | ZFYVE9   |
|         | RASGRP1  | ZNFX1    |
|         | RNASEL   |          |
|         | ROBO1    |          |
|         | S100B    |          |
|         | SAPCD2   |          |
|         | SERPINB9 |          |
|         | SERPINH1 |          |
|         | SETDB1   |          |
|         | SFRP2    |          |
|         | SLC22A7  |          |
|         | SPARC    |          |
|         | SRGAP2   |          |
|         | TDG      |          |

TET1  
TET2  
TET3  
TFEB  
TNFAIP3  
TRAF4  
TRIM68  
VDAC1  
VEGFA  
ZFP36

| hsa-miR-30c-5p | hsa-miR-92a-3p | hsa-miR-483-5p | hsa-miR-20a-5p | hsa-miR-138-5p |
|----------------|----------------|----------------|----------------|----------------|
| 0.58           | 0.52           | 0.52           | 0.38           | 0.38           |
| BCL9           | ARID4B         | ALCAM          | ABL2           | ADGRA2         |
| BECN1          | BCL2L11        | CKB            | ANKH           | AKT1           |
| CAMK2D         | BMPR2          | FAM160B2       | APP            | ARHGEF3        |
| CASP3          | CCL8           | MAPK3          | ARHGAP12       | BAG1           |
| CCND2          | CD69           | NOTCH3         | ATG16L1        | BCL11A         |
| CDC42          | CDH1           | RHOA           | BAMBI          | BLCAP          |
| CTGF           | CPEB2          | SRF            | BCL2           | CASP3          |
| DDIT4          | DNMT1          |                | BCL2L11        | CCND1          |
| DLL4           | DUSP10         |                | BMPR2          | CCND3          |
| DNMT1          | ESR2           |                | BNIP2          | CD274          |
| EIF2S1         | FBXW7          |                | CCND1          | CDH1           |
| FASN           | HDAC2          |                | CCND2          | CYTOR          |
| FOXO3          | HIPK1          |                | CDKN1A         | EED            |
| HDAC4          | HIPK3          |                | CRIM1          | EID1           |
| HSPA4          | IKZF1          |                | DAPK3          | EIF4EBP1       |
| IDH1           | ITGA5          |                | DNMT1          | EZH2           |
| IER2           | KAT2B          |                | DUSP2          | FERMT2         |
| IL11           | KLF2           |                | E2F1           | FOSL1          |
| JAK1           | KLF4           |                | E2F3           | FOXC1          |
| MCL1           | LASP1          |                | EGLN3          | GNAI2          |
| MTA1           | MAP2K4         |                | EGR2           | H2AFX          |
| MTTP           | MAPK8          |                | EPAS1          | HIF1A          |
| NCOR2          | MAPRE1         |                | ETV1           | IGF1R          |
| NOTCH1         | MYCBP2         |                | FBXO31         | KDM5C          |
| PAK1           | MYLIP          |                | GJA1           | LCN2           |
| RARB           | NR1H4          |                | HIF1A          | MAP3K11        |
| RASAL2         | OSBPL2         |                | IRF2           | MXD1           |
| RFX6           | OSBPL8         |                | ITGB8          | NFKB1          |
| RUNX2          | PCGF5          |                | KIF26B         | PTK2           |
| SERPINE1       | PHLPP1         |                | KIT            | RARA           |
| SMAD1          | PTEN           |                | LIMK1          | RELN           |
| SNAI1          | RAD21          |                | MAP2K3         | RHOC           |
| SNAI2          | RFFL           |                | MAP3K12        | RMND5A         |
| SOCS3          | RGS5           |                | MAP3K5         | ROCK2          |
| TGIF2          | SIRT1          |                | MAPK9          | S100A1         |
| TP53           | SOCS5          |                | MCL1           | SENP1          |
| TWF1           | STAT3          |                | MEF2D          | SIRT1          |
| UBE2I          | TGFBR2         |                | MYC            | SLC45A3        |
| VIM            | TP63           |                | NFKBIB         | SNAI2          |
|                |                |                | NRAS           | SOX4           |
|                |                |                | PHLPP2         | SOX9           |
|                |                |                | PKD1           | SUZ12          |
|                |                |                | PKNOX1         | TERT           |
|                |                |                | PPARG          | TWIST2         |
|                |                |                | PPP2R2A        | VIM            |
|                |                |                | PRKG1          | YAP1           |

|          |      |
|----------|------|
| PTEN     | ZEB2 |
| PTPRO    |      |
| PURA     |      |
| RB1      |      |
| RB1CC1   |      |
| RBL1     |      |
| RBL2     |      |
| REST     |      |
| RGS5     |      |
| RUNX1    |      |
| RUNX3    |      |
| SIRPA    |      |
| SMAD4    |      |
| SMAD7    |      |
| STAT3    |      |
| TCEAL1   |      |
| TGFBR1   |      |
| TGFBR2   |      |
| TIMP2    |      |
| TP53INP1 |      |
| TSG101   |      |
| UBE2C    |      |
| VEGFA    |      |
| WEE1     |      |
| ZFYVE9   |      |

| hsa-miR-193a-5p | hsa-miR-382-5p | hsa-miR-28-3p | hsa-miR-31-5p | hsa-miR-199a-3p |
|-----------------|----------------|---------------|---------------|-----------------|
| 0.32            | 0.31           | 0.28          | 0.28          | 0.26            |
| ERBB2           | DRD1           | STAT5B        | ABCB9         | AKT1            |
| IGF2BP1         | MXD1           | TP53          | ARID1A        | APOE            |
| ING5            | NFIA           |               | ARPC5         | CAV2            |
| MTOR            | PTEN           |               | BAP1          | CD44            |
| NLN             | YBX1           |               | C1QTNF9       | CDK7            |
| PIK3R3          |                |               | CASR          | DNAJA4          |
| SRR             |                |               | CDK1          | FLT1            |
| TFAP2A          |                |               | CREG1         | FOXA2           |
| TP73            |                |               | CXCL12        | FUT4            |
| WT1             |                |               | DACT3         | HGF             |
|                 |                |               | DKK1          | IGF1            |
|                 |                |               | DMD           | ITGA3           |
|                 |                |               | DOCK1         | KDR             |
|                 |                |               | E2F2          | MAPK1           |
|                 |                |               | EMSY          | MAPK14          |
|                 |                |               | ETS1          | MAPK8           |
|                 |                |               | FOXO3         | MAPK9           |
|                 |                |               | FOXP3         | MET             |
|                 |                |               | FZD3          | MTOR            |
|                 |                |               | GNA13         | PAK4            |
|                 |                |               | HIF1AN        | PTGS2           |
|                 |                |               | HOXC13        | SMARCA2         |
|                 |                |               | ICAM1         | STK11           |
|                 |                |               | IL25          | TFAM            |
|                 |                |               | ITGA5         | VEGFA           |
|                 |                |               | JAZF1         | YAP1            |
|                 |                |               | KLF13         | ZHX1            |
|                 |                |               | LATS2         |                 |
|                 |                |               | MAP4K4        |                 |
|                 |                |               | MCM2          |                 |
|                 |                |               | MET           |                 |
|                 |                |               | MLH1          |                 |
|                 |                |               | MMP16         |                 |
|                 |                |               | MPRIP         |                 |
|                 |                |               | NFAT5         |                 |
|                 |                |               | NUMB          |                 |
|                 |                |               | PPP2R2A       |                 |
|                 |                |               | PRKCE         |                 |
|                 |                |               | RAB27A        |                 |
|                 |                |               | RASA1         |                 |
|                 |                |               | RDX           |                 |
|                 |                |               | RET           |                 |
|                 |                |               | RHOA          |                 |
|                 |                |               | RHOBTB1       |                 |
|                 |                |               | SATB2         |                 |
|                 |                |               | SELE          |                 |



SGPP2  
SLC1A2  
SMAD4  
SOX4  
SP7  
SPRED1  
SPRED2  
SPRY1  
SPRY3  
SPRY4  
SRC  
STK40  
STMN1  
TBXA2R  
TIAM1  
WASF3  
XRCC5  
YY1

| hsa-miR-376c-3p | hsa-miR-520e-3p | hsa-miR-29c-3p | hsa-let-7e-5p | hsa-miR-152-3p |
|-----------------|-----------------|----------------|---------------|----------------|
| 0.17            | 0.17            | 0.16           | 0.16          | 0.15           |
| ACVR1C          | CD46            | ADAM12         | AGO1          | ADAM17         |
| BCL2            | EGFR            | AKT2           | ARID3A        | ALCAM          |
| BMI1            | MAP3K14         | AKT3           | AURKB         | ATG14          |
| GRB2            | MAP4K4          | BACE1          | CCND1         | CCKBR          |
| IGF1R           | PFKP            | BCL2           | EIF3J         | CCND1          |
| NR5A2           | ZBTB7A          | CCND2          | EZH2          | CD151          |
| RUNX2           |                 | CD274          | FASLG         | CD274          |
| TGFA            |                 | CDC42          | HMGA2         | CSF1           |
| TGFBR1          |                 | CDK6           | IGF1          | DKK1           |
| UGT2B15         |                 | CNOT6          | IGF1R         | DNMT1          |
| UGT2B17         |                 | COL10A1        | LIN28A        | FGF2           |
|                 |                 | COL15A1        | MMP9          | FGFR3          |
|                 |                 | COL1A1         | MPL           | HLA-G          |
|                 |                 | COL1A2         | MYCN          | IGF1R          |
|                 |                 | COL21A1        | PLK1          | IRS1           |
|                 |                 | COL3A1         | SMC1A         | ITGA5          |
|                 |                 | COL4A1         | TNFAIP3       | KLF4           |
|                 |                 | COL4A2         | TNFRSF10B     | KRAS           |
|                 |                 | COL5A2         | WNT1          | MAFB           |
|                 |                 | COL7A1         |               | NRP1           |
|                 |                 | CREB5          |               | PIK3R3         |
|                 |                 | CTNND1         |               | PTEN           |
|                 |                 | DNMT3A         |               | TACC3          |
|                 |                 | DNMT3B         |               | TGFA           |
|                 |                 | FBN1           |               | WNT1           |
|                 |                 | FGA            |               | XIST           |
|                 |                 | FGB            |               |                |
|                 |                 | FGG            |               |                |
|                 |                 | FRAT2          |               |                |
|                 |                 | FZD4           |               |                |
|                 |                 | FZD5           |               |                |
|                 |                 | GAPDH          |               |                |
|                 |                 | HMGCR          |               |                |
|                 |                 | IGFBP1         |               |                |
|                 |                 | ITGA6          |               |                |
|                 |                 | ITGB1          |               |                |
|                 |                 | KLF4           |               |                |
|                 |                 | LAMC1          |               |                |
|                 |                 | LAMC2          |               |                |
|                 |                 | LOX            |               |                |
|                 |                 | LRP6           |               |                |
|                 |                 | MCL1           |               |                |
|                 |                 | MMP15          |               |                |
|                 |                 | MMP2           |               |                |
|                 |                 | MMP24          |               |                |
|                 |                 | MYCN           |               |                |

NASP  
PDGFRB  
PER1  
PHLDB2  
PPP1R13B  
PTEN  
RCC2  
RFX7  
SERPINH1  
SIRT1  
SP1  
SPARC  
SRSF10  
TARBP1  
TDG  
TET2  
TFAP2C  
TGIF2  
TIAM1  
VEGFA  
WNT4

hsa-miR-30a-3p

0.15

BECN1

CDK6

CYR61

MECP2

NFATC3

NOTCH1

RUNX2

SLC7A6

THBS1

TMEM2

VEZT

XBP1
