# Supplementary material for: 明治・大正期の女子労働政策(1)(山岡通〓,宮崎澄夫両教授退職記念号)
Source: MDPI journal article supplement (doi:10.3390/ijms232415908), 1989-03-01
Supplement: s1 [file s1]

Table S4 – Proteins defining the GO terms in Figure 3

|   |            |                                   |    |          |                                                                                                                                                                                                                                                                                                         |
|---|------------|-----------------------------------|----|----------|---------------------------------------------------------------------------------------------------------------------------------------------------------------------------------------------------------------------------------------------------------------------------------------------------------|
| - | GO:0040011 | Locomotion                        | 54 | PROTEINS | MIF,CCL17,TGFB1,HGF,CCL2,CCL1,CCL13,BMP4,CCL21,CCL27,IL1B,EPCAM,KDR,ICAM1,FGF7,EGFR,CXCL13,CXCL16,PPBP,PF4,FIGF,AXL,IGFBP6,IL16,IL12A,CXCL10,ALCAM,CXCL8,CXCL11,ANG,PLAUR,CCL20,CCL28,CXCL9,XCL1,IL6R,ENG,CCL7,CCL25,CCL8,CCL26,CXCL12,IL6,NTF3,BDNF,ANGPT1,PGF,CCL5,CCL16,VEGFA,CCL14,CCL18,VEGFC,CCL4 |
| - | GO:0006935 | Chemotaxis                        | 45 | PROTEINS | MIF,CCL17,HGF,CCL2,CCL1,CCL13,BMP4,CCL21,CCL27,IL1B,FGF7,CXCL13,CXCL16,PPBP,PF4,FIGF,IL16,CXCL10,ALCAM,CXCL8,CXCL11,PLAUR,CCL20,CCL28,CXCL9,XCL1,IL6R,ENG,CCL7,CCL25,CCL8,CCL26,CXCL12,IL6,NTF3,BDNF,ANGPT1,PGF,CCL5,CCL16,VEGFA,CCL14,CCL18,VEGFC,CCL4                                                 |
| - | GO:0030595 | Leukocyte chemotaxis              | 30 | PROTEINS | CCL17,CCL2,CCL1,CCL13,CCL21,IL1B,CXCL13,CXCL16,PPBP,PF4,IL16,CXCL10,CXCL8,CXCL11,CCL20,CXCL9,XCL1,IL6R,CCL7,CCL25,CCL8,CCL26,CXCL12,IL6,CCL5,CCL16,VEGFA,CCL14,CCL18,CCL4                                                                                                                               |
| - | GO:0071621 | Granulocyte chemotaxis            | 25 | PROTEINS | CCL17,CCL2,CCL1,CCL13,CCL21,IL1B,CXCL13,PPBP,PF4,CXCL10,CXCL8,CXCL11,CCL20,CXCL9,XCL1,CCL7,CCL25,CCL8,CCL26,CCL5,CCL16,VEGFA,CCL14,CCL18,CCL4                                                                                                                                                           |
| - | GO:0048247 | Lymphocyte chemotaxis             | 21 | PROTEINS | CCL17,CCL2,CCL1,CCL13,CCL21,CXCL13,CXCL16,CXCL10,CXCL11,CCL20,XCL1,CCL7,CCL25,CCL8,CCL26,CXCL12,CCL5,CCL16,CCL14,CCL18,CCL4                                                                                                                                                                             |
| - | GO:0002548 | Monocyte chemotaxis               | 18 | PROTEINS | CCL17,CCL2,CCL1,CCL13,CCL21,CCL20,XCL1,IL6R,CCL7,CCL25,CCL8,CCL26,IL6,CCL5,CCL16,CCL14,CCL18,CCL4                                                                                                                                                                                                       |
| - | GO:0030198 | Extracellular matrix organization | 12 | PROTEINS | TIMP1,TGFB1,SERPINE1,CDH1,TIMP2,KDR,ICAM1,TNFRSF11B,CTSS,ENG,SPP1,ICAM2                                                                                                                                                                                                                                 |
