# Supplementary material for: 明治・大正期の女子労働政策(1)(山岡通〓,宮崎澄夫両教授退職記念号)
Source: MDPI journal article supplement (doi:10.3390/ijms232415908), 1989-03-01
Supplement: s1 [file s1]

Table S5 - EV-miRNAs detected in PRP-treated BMSCs secretomes

| miRBase ID      | CRT   |       |       |       |      | Weight %    |
|-----------------|-------|-------|-------|-------|------|-------------|
|                 | B1    | B2    | B3    | Mean  | SD   |             |
| hsa-miR-24-3p   | 12.24 | 12.53 | 12.40 | 12.39 | 0.12 | 20.12142652 |
| hsa-miR-193b-3p | 12.96 | 13.40 | 13.28 | 13.21 | 0.18 | 11.35032031 |
| hsa-miR-222-3p  | 12.93 | 13.66 | 13.57 | 13.38 | 0.32 | 10.08398807 |
| hsa-miR-574-3p  | 13.72 | 13.83 | 14.34 | 13.96 | 0.27 | 6.762989192 |
| hsa-miR-191-5p  | 13.75 | 13.90 | 14.25 | 13.97 | 0.21 | 6.730254585 |
| hsa-miR-1274B   | 14.28 | 14.08 | 13.84 | 14.06 | 0.18 | 6.295528960 |
| hsa-miR-320a-3p | 14.35 | 14.78 | 14.81 | 14.65 | 0.21 | 4.197880228 |
| hsa-miR-484     | 14.82 | 14.88 | 14.95 | 14.89 | 0.05 | 3.563581189 |
| hsa-miR-197-3p  | 15.65 | 16.11 | 15.73 | 15.83 | 0.20 | 1.854025114 |
| hsa-miR-125b-5p | 15.98 | 16.10 | 15.70 | 15.93 | 0.17 | 1.733067865 |
| hsa-miR-99a-5p  | 15.98 | 15.97 | 16.34 | 16.09 | 0.17 | 1.542204224 |
| hsa-miR-145-5p  | 15.98 | 15.95 | 16.49 | 16.14 | 0.25 | 1.494152546 |
| hsa-miR-19b-3p  | 15.99 | 16.43 | 16.02 | 16.15 | 0.20 | 1.486233896 |
| hsa-miR-214-3p  | 15.79 | 16.40 | 16.37 | 16.18 | 0.28 | 1.447598052 |
| hsa-miR-21-5p   | 16.71 | 16.61 | 16.48 | 16.60 | 0.10 | 1.086479443 |
| hsa-miR-342-3p  | 16.33 | 16.67 | 16.86 | 16.62 | 0.22 | 1.070779162 |
| hsa-miR-132-3p  | 16.69 | 16.77 | 16.64 | 16.70 | 0.05 | 1.011849009 |
| hsa-miR-16-5p   | 16.55 | 16.69 | 16.94 | 16.73 | 0.16 | 0.995615635 |
| hsa-miR-523-3p  | 17.79 | 16.91 | 15.53 | 16.74 | 0.93 | 0.983952511 |
| hsa-miR-409-3p  | 17.10 | 16.84 | 16.96 | 16.97 | 0.11 | 0.841476316 |
| hsa-miR-221-3p  | 16.92 | 16.97 | 17.08 | 16.99 | 0.06 | 0.829124978 |
| hsa-miR-1274A   | 17.21 | 16.95 | 16.94 | 17.03 | 0.12 | 0.803847975 |
| hsa-miR-636     | 22.93 | 15.48 | 12.76 | 17.06 | 4.30 | 0.790403154 |
| hsa-let-7b-5p   | 17.78 | 16.10 | 17.35 | 17.08 | 0.71 | 0.780602681 |
| hsa-miR-210-3p  | 16.83 | 17.27 | 17.13 | 17.08 | 0.18 | 0.779341548 |
| hsa-miR-29a-3p  | 16.82 | 17.47 | 17.27 | 17.19 | 0.27 | 0.722629345 |
| hsa-miR-30b-5p  | 17.38 | 17.40 | 17.32 | 17.36 | 0.03 | 0.639490414 |
| hsa-miR-106a-5p | 17.23 | 17.58 | 17.47 | 17.43 | 0.15 | 0.610894287 |
| hsa-miR-17-5p   | 17.39 | 17.49 | 17.44 | 17.44 | 0.04 | 0.606534357 |
| hsa-miR-30c-5p  | 17.78 | 17.39 | 17.33 | 17.50 | 0.20 | 0.582633817 |
| hsa-miR-720     | 17.94 | 17.54 | 17.49 | 17.66 | 0.20 | 0.521351303 |
| hsa-miR-92a-3p  | 17.43 | 17.95 | 17.63 | 17.67 | 0.21 | 0.517749975 |
| hsa-miR-483-5   | 17.77 | 17.66 | 17.58 | 17.67 | 0.08 | 0.51655530  |
| hsa-miR-20a-5p  | 18.22 | 18.29 | 17.88 | 18.13 | 0.18 | 0.376397024 |
| hsa-miR-138-5p  | 17.69 | 18.53 | 18.18 | 18.13 | 0.34 | 0.375008235 |
| hsa-miR-193a-5p | 18.03 | 18.53 | 18.51 | 18.36 | 0.23 | 0.321448809 |
| hsa-miR-382-5p  | 17.56 | 19.12 | 18.50 | 18.39 | 0.64 | 0.313599274 |
| hsa-miR-28-3p   | 18.39 | 18.76 | 18.57 | 18.57 | 0.15 | 0.276431568 |
| hsa-miR-31-5p   | 18.40 | 18.81 | 18.52 | 18.58 | 0.17 | 0.275793598 |
| hsa-miR-199a-3p | 18.20 | 18.97 | 18.89 | 18.69 | 0.35 | 0.255134201 |
| hsa-miR-376c-3p | 18.97 | 19.09 | 19.76 | 19.28 | 0.35 | 0.169888586 |
| hsa-miR-520e-3p | 20.11 | 22.56 | 15.28 | 19.32 | 3.03 | 0.165204860 |
| hsa-miR-29c-3p  | 15.98 | 21.49 | 20.49 | 19.32 | 2.40 | 0.164899729 |

|                       |              |              |              |              |             |                    |
|-----------------------|--------------|--------------|--------------|--------------|-------------|--------------------|
| <b>hsa-let-7e-5p</b>  | <b>18.14</b> | <b>19.62</b> | <b>20.32</b> | <b>19.36</b> | <b>0.91</b> | <b>0.160575943</b> |
| <b>hsa-miR-152-3p</b> | <b>19.69</b> | <b>19.39</b> | <b>19.31</b> | <b>19.46</b> | <b>0.16</b> | <b>0.149097433</b> |
| <b>hsa-miR-30a-3p</b> | <b>19.88</b> | <b>18.79</b> | <b>19.82</b> | <b>19.50</b> | <b>0.50</b> | <b>0.145490183</b> |
| hsa-miR-34a-5p        | 19.85        | 19.65        | 19.30        | 19.60        | 0.23        | 0.135559150        |
| hsa-miR-186-5p        | 19.68        | 19.38        | 19.98        | 19.68        | 0.24        | 0.128721664        |
| hsa-miR-212-3p        | 19.64        | 19.70        | 19.76        | 19.70        | 0.05        | 0.126510393        |
| hsa-miR-99b-5p        | 19.97        | 19.93        | 19.50        | 19.80        | 0.21        | 0.118202154        |
| hsa-miR-551b-3p       | 21.60        | 19.08        | 18.82        | 19.83        | 1.26        | 0.115529028        |
| hsa-miR-376a-3p       | 19.91        | 19.94        | 19.90        | 19.92        | 0.02        | 0.108868710        |
| hsa-miR-328-3p        | 19.92        | 20.15        | 19.78        | 19.95        | 0.15        | 0.106406704        |
| hsa-miR-331-3p        | 19.82        | 20.20        | 20.07        | 20.03        | 0.16        | 0.100736689        |
| hsa-miR-194-5p        | 19.33        | 21.03        | 19.98        | 20.11        | 0.70        | 0.095148708        |
| hsa-miR-146a-5p       | 19.91        | 20.42        | 20.47        | 20.26        | 0.25        | 0.085713169        |
| hsa-miR-149-5p        | 20.04        | 20.24        | 20.58        | 20.29        | 0.22        | 0.084396533        |
| hsa-miR-425-5p        | 19.76        | 20.51        | 20.82        | 20.36        | 0.45        | 0.079899392        |
| hsa-miR-143-3p        | 20.17        | 20.60        | 20.35        | 20.37        | 0.18        | 0.079402497        |
| hsa-miR-130a-3p       | 20.48        | 20.72        | 20.16        | 20.45        | 0.23        | 0.075084592        |
| hsa-miR-663b          | 21.03        | 20.36        | 20.59        | 20.66        | 0.28        | 0.064973455        |
| hsa-miR-886-5p        | 20.52        | 20.74        | 20.79        | 20.68        | 0.12        | 0.064004982        |
| hsa-miR-106b-5p       | 20.94        | 20.66        | 20.47        | 20.69        | 0.19        | 0.063768767        |
| hsa-miR-335-5p        | 20.97        | 20.77        | 20.54        | 20.76        | 0.18        | 0.060678436        |
| hsa-miR-26a-5p        | 20.90        | 21.02        | 20.51        | 20.81        | 0.21        | 0.058679249        |
| hsa-miR-146b-5p       | 20.51        | 20.70        | 21.45        | 20.89        | 0.40        | 0.055680932        |
| hsa-miR-365a-3p       | 20.89        | 21.02        | 20.79        | 20.90        | 0.10        | 0.055219720        |
| hsa-miR-127-3p        | 21.55        | 20.69        | 20.70        | 20.98        | 0.40        | 0.052265197        |
| hsa-miR-339-5p        | 20.99        | 20.69        | 21.37        | 21.02        | 0.28        | 0.050871267        |
| hsa-miR-224-5p        | 21.43        | 20.41        | 21.29        | 21.04        | 0.45        | 0.049847366        |
| hsa-miR-218-5p        | 20.99        | 21.09        | 21.12        | 21.07        | 0.05        | 0.049104337        |
| hsa-miR-125a-5p       | 20.46        | 20.91        | 21.87        | 21.08        | 0.59        | 0.048720096        |
| hsa-let-7a-5p         | 21.22        | 20.72        | 21.34        | 21.09        | 0.27        | 0.048238461        |
| hsa-miR-31-3p         | 21.55        | 21.32        | 20.90        | 21.26        | 0.27        | 0.043035207        |
| hsa-miR-590-5p        | 20.91        | 21.51        | 21.46        | 21.29        | 0.27        | 0.041974626        |
| hsa-miR-155-5p        | 20.61        | 21.31        | 22.07        | 21.33        | 0.59        | 0.040921243        |
| hsa-miR-134-5p        | 20.90        | 21.43        | 21.92        | 21.42        | 0.42        | 0.038517576        |
| hsa-miR-532-5p        | 21.23        | 21.59        | 21.53        | 21.45        | 0.16        | 0.037663930        |
| hsa-miR-345-5p        | 20.97        | 22.15        | 21.27        | 21.46        | 0.50        | 0.037282983        |
| hsa-miR-301a-3p       | 21.70        | 21.85        | 21.06        | 21.54        | 0.35        | 0.035484355        |
| hsa-let-7g-5p         | 21.60        | 21.14        | 21.89        | 21.54        | 0.31        | 0.035312633        |
| hsa-miR-660-5p        | 21.39        | 21.68        | 21.86        | 21.64        | 0.19        | 0.032925011        |
| hsa-miR-130b-3p       | 21.49        | 21.66        | 21.80        | 21.65        | 0.13        | 0.032826261        |
| hsa-miR-10b-3p        | 21.90        | 21.54        | 21.57        | 21.67        | 0.16        | 0.032351888        |
| hsa-miR-30e-3p        | 20.25        | 20.56        | 24.23        | 21.68        | 1.80        | 0.032069114        |
| hsa-miR-7-1-3p        | 21.90        | 21.57        | 21.82        | 21.76        | 0.14        | 0.030325196        |
| hsa-miR-27a-3p        | 21.46        | 21.99        | 21.87        | 21.77        | 0.23        | 0.030115733        |
| hsa-miR-27b-3p        | 21.64        | 22.36        | 21.39        | 21.80        | 0.41        | 0.029536868        |
| hsa-miR-423-5p        | 21.83        | 21.72        | 21.98        | 21.84        | 0.11        | 0.028722554        |
| hsa-miR-339-3p        | 21.93        | 22.11        | 21.47        | 21.84        | 0.27        | 0.028722554        |

|                 |       |       |       |       |      |             |
|-----------------|-------|-------|-------|-------|------|-------------|
| hsa-miR-1260a   | 21.92 | 20.86 | 22.85 | 21.88 | 0.81 | 0.028021172 |
| hsa-miR-93-5p   | 21.42 | 22.20 | 22.10 | 21.90 | 0.35 | 0.027482579 |
| hsa-miR-140-5p  | 21.96 | 21.99 | 21.91 | 21.95 | 0.03 | 0.026589381 |
| hsa-miR-19a-3p  | 22.01 | 22.22 | 21.64 | 21.95 | 0.24 | 0.026546412 |
| hsa-miR-494-3p  | 21.95 | 22.18 | 21.95 | 22.03 | 0.11 | 0.025254101 |
| hsa-miR-193b-5p | 21.91 | 22.10 | 22.20 | 22.07 | 0.12 | 0.024495516 |
| hsa-miR-1290    | 22.19 | 21.67 | 22.55 | 22.14 | 0.36 | 0.023383923 |
| hsa-miR-15b-5p  | 22.39 | 22.44 | 21.69 | 22.17 | 0.34 | 0.022812905 |
| hsa-miR-23a-3p  | 22.49 | 22.18 | 22.15 | 22.27 | 0.15 | 0.021334434 |
| hsa-miR-370-3p  | 22.29 | 22.65 | 22.03 | 22.33 | 0.25 | 0.020522172 |
| hsa-miR-374a-5p | 22.34 | 22.88 | 21.80 | 22.34 | 0.44 | 0.020295839 |
| hsa-miR-99b-3p  | 21.94 | 22.44 | 22.65 | 22.35 | 0.30 | 0.020239649 |
| hsa-miR-26b-5p  | 22.83 | 22.05 | 22.51 | 22.46 | 0.32 | 0.018671665 |
| hsa-miR-30a-5p  | 23.16 | 22.25 | 22.11 | 22.51 | 0.46 | 0.018102434 |
| hsa-miR-25-3p   | 22.74 | 22.36 | 22.44 | 22.51 | 0.16 | 0.018018982 |
| hsa-miR-625-3p  | 22.30 | 22.17 | 23.19 | 22.55 | 0.46 | 0.017510060 |
| hsa-let-7c-5p   | 21.92 | 22.52 | 23.59 | 22.68 | 0.69 | 0.016064213 |
| hsa-miR-361-5p  | 22.24 | 22.77 | 23.09 | 22.70 | 0.35 | 0.015821111 |
| hsa-miR-410-3p  | 22.94 | 22.64 | 22.58 | 22.72 | 0.16 | 0.015606896 |
| hsa-miR-148a-3p | 22.75 | 22.71 | 22.87 | 22.78 | 0.07 | 0.015019646 |
| hsa-miR-10a-5p  | 22.55 | 22.88 | 22.91 | 22.78 | 0.16 | 0.014978057 |
| hsa-miR-195-5p  | 22.76 | 23.16 | 22.73 | 22.88 | 0.20 | 0.013942771 |
| hsa-miR-323a-3p | 22.68 | 22.79 | 23.24 | 22.90 | 0.24 | 0.013760348 |
| hsa-miR-432-3p  | 23.07 | 22.47 | 23.25 | 22.93 | 0.33 | 0.013514585 |
| hsa-miR-708-5p  | 23.29 | 23.27 | 22.24 | 22.93 | 0.49 | 0.013458497 |
| hsa-miR-34a-3p  | 23.91 | 22.31 | 22.66 | 22.96 | 0.69 | 0.013205911 |
| hsa-miR-766-3p  | 23.80 | 22.83 | 22.37 | 23.00 | 0.60 | 0.012841826 |
| hsa-miR-664a-3p | 23.20 | 23.06 | 23.21 | 23.16 | 0.07 | 0.011523011 |
| hsa-miR-532-3p  | 23.10 | 23.32 | 23.30 | 23.24 | 0.10 | 0.010896394 |
| hsa-miR-34b-3p  | 24.08 | 23.10 | 22.83 | 23.34 | 0.54 | 0.010173739 |
| hsa-miR-296-5p  | 23.87 | 23.63 | 22.64 | 23.38 | 0.53 | 0.009872702 |
| hsa-miR-192-5p  | 22.23 | 24.11 | 23.85 | 23.39 | 0.83 | 0.009779623 |
| hsa-miR-93-3p   | 23.44 | 23.20 | 23.57 | 23.40 | 0.15 | 0.009739036 |
| hsa-miR-181a-5p | 23.31 | 23.67 | 23.31 | 23.43 | 0.17 | 0.009551838 |
| hsa-miR-324-3p  | 23.77 | 23.60 | 23.13 | 23.50 | 0.27 | 0.009109962 |
| hsa-miR-744-5p  | 24.10 | 23.08 | 23.75 | 23.65 | 0.43 | 0.008214156 |
| hsa-miR-28-5p   | 23.73 | 23.55 | 23.78 | 23.68 | 0.10 | 0.008000623 |
| hsa-miR-454-3p  | 24.55 | 23.26 | 23.85 | 23.89 | 0.53 | 0.006955293 |
| hsa-miR-223-3p  | 24.19 | 24.82 | 22.97 | 23.99 | 0.77 | 0.006452146 |
| hsa-miR-103a-3p | 24.03 | 23.81 | 24.19 | 24.01 | 0.16 | 0.006392786 |
| hsa-miR-487b-3p | 24.05 | 23.63 | 24.38 | 24.02 | 0.31 | 0.006338373 |
| hsa-miR-539-5p  | 23.97 | 24.26 | 24.10 | 24.11 | 0.12 | 0.005952290 |
| hsa-miR-374b-5p | 23.66 | 24.70 | 24.27 | 24.21 | 0.42 | 0.005552401 |
| hsa-miR-411-5p  | 23.99 | 24.34 | 24.50 | 24.28 | 0.21 | 0.005310247 |
| hsa-miR-330-3p  | 24.99 | 24.04 | 23.90 | 24.31 | 0.48 | 0.005185364 |
| hsa-miR-215-5p  | 22.99 | 24.38 | 25.89 | 24.42 | 1.18 | 0.004793608 |
| hsa-miR-452-5p  | 23.93 | 24.79 | 24.87 | 24.53 | 0.42 | 0.004443752 |

|                  |       |       |       |       |      |             |
|------------------|-------|-------|-------|-------|------|-------------|
| hsa-miR-485-3p   | 24.40 | 24.63 | 24.58 | 24.53 | 0.10 | 0.004442726 |
| hsa-miR-615-3p   | 24.72 | 24.79 | 24.45 | 24.65 | 0.15 | 0.004091922 |
| hsa-miR-629-3p   | 25.91 | 24.00 | 24.23 | 24.72 | 0.85 | 0.003908944 |
| hsa-miR-203a-3p  | 24.88 | 25.86 | 23.61 | 24.78 | 0.92 | 0.003731558 |
| hsa-miR-886-3p   | 23.98 | 24.90 | 25.53 | 24.80 | 0.63 | 0.003682737 |
| hsa-miR-433-3p   | 24.20 | 24.86 | 25.44 | 24.83 | 0.51 | 0.003610282 |
| hsa-miR-185-5p   | 23.96 | 25.27 | 25.27 | 24.83 | 0.62 | 0.003606949 |
| hsa-miR-493-3p   | 24.50 | 24.71 | 25.48 | 24.90 | 0.42 | 0.003446453 |
| hsa-miR-491-5p   | 24.86 | 25.13 | 24.91 | 24.97 | 0.12 | 0.003292337 |
| hsa-miR-425-3p   | 24.46 | 24.81 | 26.34 | 25.20 | 0.81 | 0.002792283 |
| hsa-miR-140-3p   | 24.84 | 25.58 | 25.18 | 25.20 | 0.30 | 0.002791639 |
| hsa-miR-1271-5p  | 25.51 | 26.33 | 24.09 | 25.31 | 0.93 | 0.002587895 |
| hsa-miR-942-5p   | 24.73 | 25.42 | 26.22 | 25.45 | 0.61 | 0.002345310 |
| hsa-miR-615-5p   | 25.12 | 26.85 | 25.04 | 25.67 | 0.83 | 0.002020593 |
| hsa-miR-483-3p   | 25.38 | 23.91 | 28.28 | 25.86 | 1.82 | 0.001772901 |
| hsa-miR-214-5p   | 25.35 | 26.84 | 25.62 | 25.94 | 0.65 | 0.001679205 |
| hsa-miR-335-3p   | 25.84 | 25.25 | 26.81 | 25.96 | 0.64 | 0.001647691 |
| hsa-miR-187-3p   | 26.34 | 26.27 | 25.71 | 26.11 | 0.28 | 0.001493584 |
| hsa-miR-424-3p   | 25.93 | 26.41 | 26.13 | 26.16 | 0.20 | 0.001441707 |
| hsa-miR-628-3p   | 25.84 | 25.88 | 26.86 | 26.19 | 0.47 | 0.001405203 |
| hsa-miR-589-3p   | 25.86 | 25.91 | 27.00 | 26.26 | 0.52 | 0.001345161 |
| hsa-miR-885-5p   | 26.09 | 27.72 | 25.05 | 26.28 | 1.10 | 0.001319915 |
| hsa-miR-455-5p   | 26.55 | 26.89 | 25.50 | 26.31 | 0.59 | 0.001295144 |
| hsa-miR-27b-5p   | 26.39 | 25.83 | 26.98 | 26.40 | 0.47 | 0.001220477 |
| hsa-miR-133a-3p  | 25.36 | 26.55 | 27.56 | 26.49 | 0.90 | 0.001142963 |
| hsa-miR-126-3p   | 25.77 | 26.91 | 26.81 | 26.50 | 0.52 | 0.001140325 |
| hsa-miR-30d-3p   | 26.87 | 27.05 | 25.61 | 26.51 | 0.64 | 0.001127748 |
| hsa-miR-10b-5p   | 26.75 | 27.12 | 25.70 | 26.52 | 0.61 | 0.001117632 |
| hsa-miR-889-3p   | 28.98 | 25.32 | 25.44 | 26.58 | 1.70 | 0.001073840 |
| hsa-miR-20b-5p   | 27.00 | 25.83 | 27.06 | 26.63 | 0.57 | 0.001037980 |
| hsa-miR-22-5p    | 26.19 | 25.86 | 28.36 | 26.80 | 1.11 | 0.000921749 |
| hsa-miR-24-2-5p  | 28.09 | 26.94 | 26.52 | 27.19 | 0.66 | 0.000706508 |
| hsa-miR-1285-3p  | 27.83 | 27.27 | 26.65 | 27.25 | 0.48 | 0.000676477 |
| hsa-miR-769-5p   | 28.64 | 27.13 | 26.23 | 27.33 | 0.99 | 0.000637330 |
| hsa-miR-136-3p   | 28.21 | 25.74 | 28.41 | 27.45 | 1.22 | 0.000587412 |
| hsa-miR-193a-3p  | 26.51 | 27.48 | 28.41 | 27.47 | 0.78 | 0.000580665 |
| hsa-miR-500a-5p  | 27.53 | 28.88 | 27.02 | 27.81 | 0.79 | 0.000458008 |
| hsa-miR-1291     | 28.21 | 27.50 | 27.74 | 27.82 | 0.30 | 0.000455581 |
| hsa-miR-650      | 29.01 | 27.84 | 26.90 | 27.91 | 0.87 | 0.000426252 |
| hsa-miR-18a-5p   | 28.78 | 27.84 | 27.27 | 27.96 | 0.62 | 0.000411637 |
| hsa-miR-151a-5p  | 29.04 | 27.21 | 28.27 | 28.17 | 0.75 | 0.000356122 |
| hsa-miR-130b-5p  | 27.75 | 28.40 | 28.48 | 28.21 | 0.33 | 0.000346785 |
| hsa-miR-1255b-5p | 29.90 | 28.17 | 29.12 | 29.06 | 0.71 | 0.000192258 |
| hsa-miR-145-3p   | 31.60 | 28.41 | 29.31 | 29.77 | 1.34 | 0.000117612 |
| hsa-miR-502-3p   | 31.28 | 29.53 | 28.99 | 29.93 | 0.98 | 0.000105339 |
| hsa-miR-505-5p   | 29.68 | 30.79 | 29.92 | 30.13 | 0.48 | 9.19788E-05 |
| hsa-miR-125a-3p  | 31.50 | 28.02 | 31.63 | 30.38 | 1.67 | 7.69702E-05 |

In **bold**, miRNAs falling in the first quartile
